# Supplementary material for: Higher Availability of Long-Chain Monounsaturated Fatty Acids in Preterm than in Full-Term Human Milk
Source: MDPI journal article supplement (doi:10.3390/life13051205), 2023-05-17
Supplement: s1 [file s1]

# Higher availability of long-chain monounsaturated fatty acids in preterm than in full-term human milk

Tamás Marosvölgyi<sup>1,2\*</sup>, Timea Dergez<sup>1</sup>, József L. Szentpéteri<sup>3</sup>, Éva Szabó<sup>2,4\*</sup> and Tamás Decsi<sup>2</sup>

<sup>1</sup> Institute of Bioanalysis, Medical School, University of Pécs, Pécs, Hungary

<sup>2</sup> Department of Paediatrics, Medical School, University of Pécs, Pécs, Hungary

<sup>3</sup> Institute of Transdisciplinary Discoveries, Medical School, University of Pécs, Pécs, Hungary

<sup>4</sup> Department of Biochemistry and Medical Chemistry, Medical School, University of Pécs, Pécs, Hungary

**Table S1:** Preterm (PT) and full-term (FT) human milk weighted least squares mean contents of individual long-chain monounsaturated fatty acids (LCMUFA) and estimated LCMUFA across lactation stages in weight%(g/100 g) based on Table 2 and 3 in [29]

| Lactation stage           |                                  | C20:1n-9  |                 | C22:1n-9  |                 | C24:1n-9  |                 | Estimated LCMUFA |
|---------------------------|----------------------------------|-----------|-----------------|-----------|-----------------|-----------|-----------------|------------------|
| Mean $\pm$ SEM            |                                  | k (N)     | weight %        | k (N)     | weight %        | k (N)     | weight %        | weight %         |
| C<br>(0 – $\leq$ 5 d)     | PT ( $\leq$ 37 w)                | 4 (50)    | 0.66 $\pm$ 0.02 | 5 (282)   | 0.16 $\pm$ 0.00 | 7 (328)   | 0.29 $\pm$ 0.01 | 1.11             |
|                           | FT<br>( $\geq$ 37 – $\leq$ 42 w) | 13 (470)  | 0.88 $\pm$ 0.07 | 9 (374)   | 0.22 $\pm$ 0.02 | 12 (502)  | 0.28 $\pm$ 0.04 | 1.38             |
| TM<br>(6 – $\leq$ 15)     | PT ( $\leq$ 37 w)                | 4 (70)    | 0.50 $\pm$ 0.01 | 6 (360)   | 0.12 $\pm$ 0.02 | 6 (318)   | 0.14 $\pm$ 0.00 | 0.76             |
|                           | FT<br>( $\geq$ 37 – $\leq$ 42 w) | 12 (553)  | 0.60 $\pm$ 0.05 | 11 (513)  | 0.21 $\pm$ 0.07 | 9 (415)   | 0.27 $\pm$ 0.12 | 1.08             |
| MHM<br>(16 – $\leq$ 60 d) | PT ( $\leq$ 37 w)                | 2 (26)    | 0.44 $\pm$ 0.06 | 5 (298)   | 0.08 $\pm$ 0.00 | 5 (305)   | 0.04 $\pm$ 0.00 | 0.56             |
|                           | FT<br>( $\geq$ 37 – $\leq$ 42 w) | 24 (1768) | 0.45 $\pm$ 0.03 | 20 (1697) | 0.11 $\pm$ 0.01 | 20 (1532) | 0.07 $\pm$ 0.01 | 0.63             |

Fatty acid values are given in the mean  $\pm$  SEM form.

Abbreviations: C: colostrum, k: number of included studies, MHM: mature milk, N: number of participating mothers, TM: transitional milk
